# Supplementary material for: Magnetic clusters and ferromagnetic spin glass in the novel hexagonal perovskite 12R-Ba4SbMn3O12
Source: Royal Society of Chemistry journal article supplement (doi:10.1039/d3ra00607g), 2023-01-01
Supplement: d3ra00607g1.pdf [file d3ra00607g1.pdf]

## Supporting Information for

### Magnetic Clusters and Ferromagnetic Spin Glass in the Novel Hexagonal Perovskite $12R\text{-Ba}_4\text{SbMn}_3\text{O}_{12}$

Xiaohui Yan<sup>a</sup>, Junkun Wu<sup>a</sup>, Xiuyun Lei<sup>a,\*</sup>, Lunhua He<sup>b,c,d</sup>, Wenbin Guo<sup>a,\*</sup>, Xiaojun Kuang<sup>a,e</sup> and  
Congling Yin<sup>a,\*</sup>

*a. MOE Key Laboratory of New Processing Technology for Nonferrous Metal and Materials, Guangxi Key Laboratory of Optic and Electronic Materials and Devices, College of Materials Science and Engineering, Guilin University of Technology, Guilin 541004, P. R. China*

*b. Spallat. Neutron Source Sci. Ctr, Dongguan 523803, P. R China*

*c. Chinese Acad Sci, Inst Phys, Beijing Natl Lab Condensed Matter Phys, Beijing 100190, P. R China*

*d. Songshan Lake Mat Lab, Dongguan 523808, P. R China*

*e. College of Chemistry and Bioengineering, Guilin University of Technology, Guilin 541004, P. R. China*

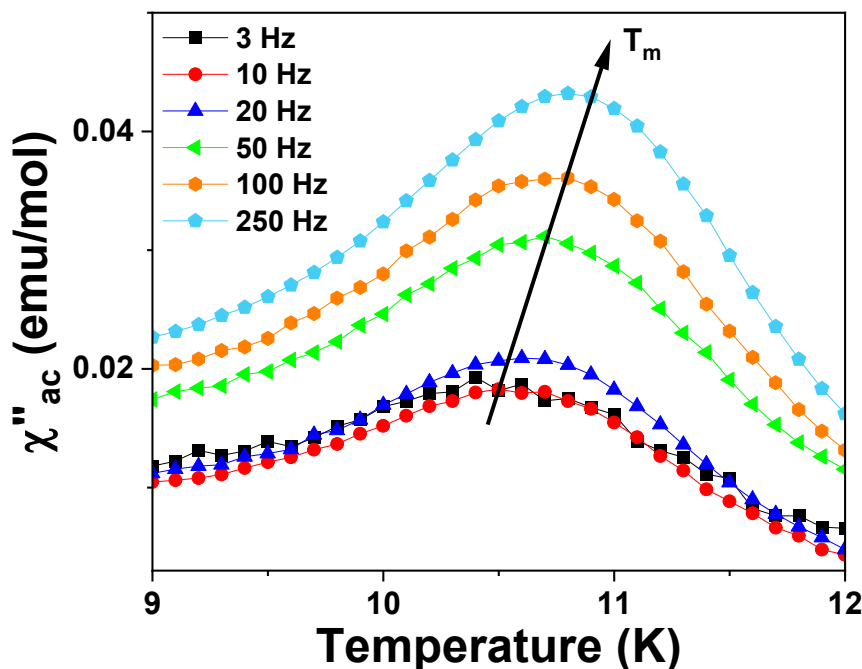

**Fig. S1** Temperature dependence of the imaginary *ac* susceptibility component  $\chi''$  at frequencies of  $3 \leq f \leq 250$  Hz.

Table S1. Structural information and ground magnetic state of 12R Ba<sub>4</sub>MMnO<sub>12</sub> perovskite

| Compounds (Ref.)                                                                   | Space group         | <i>a</i> (Å) | <i>c</i> (Å) | <i>V</i> (Å <sup>3</sup> ) | Ground state              |
|------------------------------------------------------------------------------------|---------------------|--------------|--------------|----------------------------|---------------------------|
| Ba <sub>4</sub> NbMn <sub>3</sub> O <sub>12</sub> <sup>[1]</sup>                   | <i>R</i> $\bar{3}m$ | 5.71825(3)   | 28.1158(3)   | 796.15                     | FM; T <sub>C</sub> =42 K  |
| Ba <sub>4</sub> Sn <sub>1.1</sub> Mn <sub>2.9</sub> O <sub>12</sub> <sup>[2]</sup> | <i>R</i> $\bar{3}m$ | 5.72904(3)   | 28.1637(3)   | 800.54(1)                  | AFM, T <sub>N</sub> =6 K  |
| Ba <sub>4</sub> CeMn <sub>3</sub> O <sub>12</sub> <sup>[3]</sup>                   | <i>R</i> $\bar{3}m$ | 5.7980(1)    | 28.6070(8)   | 832.83(4)                  | AFM, T <sub>N</sub> = 6 K |
| Ba <sub>4</sub> YMn <sub>3</sub> O <sub>11.5</sub> <sup>[4]</sup>                  | <i>R</i> $\bar{3}m$ | 5.78752(3)   | 28.6213(3)   | 830.24(2)                  | AFM, T <sub>N</sub> =4 K  |
| Ba <sub>4</sub> Ti <sub>2</sub> Mn <sub>2</sub> O <sub>12</sub> <sup>[5]</sup>     | <i>R</i> $\bar{3}m$ | 5.6913(1)    | 27.9186(2)   | 783.168(4)                 | AFM, T <sub>N</sub> =45 K |
| Ba <sub>4</sub> PrMn <sub>3</sub> O <sub>12</sub> <sup>[6]</sup>                   | <i>R</i> $\bar{3}m$ | 5.7943(1)    | 28.5716(3)   | 830.76(1)                  |                           |
| Ba <sub>4</sub> InMn <sub>3</sub> O <sub>11.5</sub> <sup>[7]</sup>                 | <i>R</i> $\bar{3}m$ | 5.7382(2)    | 28.240       | 805.28                     |                           |
| Ba <sub>4</sub> SbMn <sub>3</sub> O <sub>12</sub>                                  | <i>R</i> $\bar{3}m$ | 5.72733(3)   | 28.1770(3)   | 804.073(2)                 | FM, T <sub>C</sub> =11.5K |

## References

- 1 L. T. Nguyen, T. Kong and R. J. Cava, *Mater. Res. Express*, 2019, **6**, 056108.
- 2 J. Wu, X. Yan, W. Guo, X. Wang, C. Yin and X. Kuang, *RSC Adv.*, 2021, **11**, 40235-40242.
- 3 M. A. Macías, O. Mentré, C. Pirovano, P. Roussel, S. Colis and G. H. Gauthier, *New J. Chem.*, 2015, **39**, 829-835.
- 4 X. J. Kuang, C. Bridges, M. Allix, J. B. Claridge, H. Hughes and M. J. Rosseinsky, *Chem. Mater.*, 2006, **18**, 5130-5136.
- 5 G. M. Keith, C. A. Kirk, K. Sarma, N. M. Alford, E. J. Cussen, M. J. Rosseinsky and D. C. Sinclair, *Chem. Mater.*, 2004, **16**, 2007-2015.
- 6 A. F. Fuentes, K. Boulahya and U. Amador, *J. Solid State Chem.*, 2004, **177**, 714-720.
- 7 N. Créon, C. Michel, M. Hervieu, A. Maignan and B. Raveau, *Solid State Sci.*, 2003, **5**, 243-248.
